# Supplementary material
Source: publisher site journal article supplement (https://www.dovepress.com/article/268953)
Supplement: Supplementary file 1 [file get_supplementary_file.php]

**Supplementary materials**

**Appendix:** The OAT Patient Education Program:

A committee composed of 2 specialists in educational science, 2 pharmacists, 1 methodologist, 1 oncologist, two nurse educators was gathered at the very beginning of the PEP OAT stud in order to construct the core of the program for the 3 participating centers. The 3 centers were represented in this committee.

The construction of the program followed the steps of the Cancer patient education recommendations 21 for providing a program of quality, acceptable by the whole institution and patients.

The committee first assessed patient needs as regards to OAT. Representatives of the 3 centers provided data from their setting either as socio-anthropological studies conducted among patients, or as questionnaires administered to patients and health professionals, or in the form of pharmacological consultation observations.

The construction of a "core" skills reference framework, common to the three centres, based on these educational needs and following the methodologies derived from the educational sciences, was carried out in a consensual process during the successive meetings of the group of experts. The committee first of all identified the skills and contributing pedagogical objectives common to the needs identified in the three centres, and then established a consensus in terms of wording and content. Bloom's taxonomy, which is widely used in objective-based pedagogy, was applied to redefine the contributory pedagogical objectives that will be proposed in the competency reference framework of the core program. The "core" competency framework resulting from this reflection lists all of the "key" competencies that an educational team caring for patients treated with cancer drugs must be able to offer patients to acquire, while taking into account the human and material resources available to it. It aims to enable teams to structure their educational actions by defining by consensus, according to each competence and contributing objectives, the key messages, educational and evaluation techniques and tools that will be used.

**Table S1 : The core competencies reference framework of the OAT PEP**

| **Self care skills** | **contributory educational objectives** | **Psychosocial skills** |
| --- | --- | --- |
| To make one's needs known, to inform one's entourage | 1. Expressing representations of the disease  2. Explain his or her representations of the treatment  3. Expressing his or her affective and emotional experience  4. Expressing difficulties  5. Express his or her projects | Knowing yourself, having self-confidence  Know how to manage your emotions, control your stress  Developing communication and interpersonal skills  Setting goals and making choices  Observing, evaluating and strengthening oneself |
| Understand, explain | 1. Describe his or her illness 2. Identify the modalities of medical follow-up 3. Decipher the information received on the disease 4. Explain his or her treatments 5. Explain the storage conditions of the drug 6. Describe how the treatment is to be taken 7. Explain the value of respecting the terms and conditions of taking 8. List possible side effects 9. Relate treatment to possible side effects 10. Explain the consequences of dys-observance (under and over) 11. Explain what to do if he or she forgets to take the plug. 12. Explain what to do in case of symptoms such as fever, nausea, vomiting, digestive problems, mucite, oedema, bleeding, skin problems.... 13. Cite elements of treatment monitoring 14. Explain the risks of self-medication 15. Explain the risks of food interactions | Develop creative thinking and critical reflection |
| Identify, analyze, measure | 1. Interpret his or her prescription 2. Take into account the elements of monitoring 3. Distinguish possible adverse effects related to the disease or treatment 4. Analyze risk situations 5. Identify the emergency | Knowing yourself, having self-confidence  Develop creative thinking and critical thinking  Observing, evaluating and strengthening oneself |
| Coping, deciding | Call the service as needed | Knowing how to manage his or her emotions, control the stress  Develop creative thinking and critical reflection  Developing communication and interpersonal skills  Setting goals and making choices  Observing, evaluating and strengthening oneself |
| Solving a problem of daily therapy, managing one's life and illness, solving a problem of prevention. | 1. Adapt his or her eating behaviour according to your appetite, your disorders, the occurrence of undesirable effects and the foods to avoid 2. Identify personal resources 3. Maintaining a social life 4. Managing Stress 5. Maintaining well-being, knowing how to relax 6. Maintaining self-esteem 7. Maintaining self-confidence | Knowing yourself, having self-confidence  Know how to manage your emotions, control your stress  Develop creative thinking and critical thinking  Develop communication and interpersonal skills  Make decisions and solve a problem  Setting goals and making choices  Observing, evaluating and strengthening oneself |
| Adapting, readjusting | Implementing strategies to better live with the constraints of disease and treatment | Knowing yourself, having self-confidence  Develop creative thinking and critical reflection  Know how to manage his or her emotions, control your stress  Developing communication and interpersonal skills  Make decisions and solve a problem  Setting goals and making choices  Observing, evaluating and strengthening oneself |
| Using the resources of the health care system, asserting one's rights | 1. Identify the relays/helpers (patient associations, attending physician, various interlocutors...) 2. Develop his or her network 3. Identify the right interlocutor according to the situation | Develop communication and interpersonal skills  Make decisions and solve a problem  Setting goals and making choices |
